# Supplementary material for: Shiga-Toxin-Producing Strains of Escherichia coli O104:H4 and a Strain of O157:H7, Which Can Cause Human Hemolytic Uremic Syndrome, Differ in Biofilm Formation in the Presence of CO2 and in Their Ability to Grow in a Novel Cell Culture Medium
Source: MDPI journal article supplement (doi:10.3390/microorganisms11071744), 2023-07-03
Supplement: s1 [file s1]

**Table S1.** Phenotypic differences displayed by Biolog GEN III plates of *E. coli* strains used in the present study. Only differences between the strains are shown.

| Compound/Condition <sup>a</sup> | <i>E. coli</i> Strains |        |                                              |                                               |                                               |
|---------------------------------|------------------------|--------|----------------------------------------------|-----------------------------------------------|-----------------------------------------------|
|                                 | ATCC 25922             | O157H7 | O104:H4 (Ec 01)<br>(2011C-3493) <sup>b</sup> | O104:H4 (Ec 02)<br>(2009EL-2050) <sup>b</sup> | O104:H4 (Ec 03)<br>(2009EL-2071) <sup>b</sup> |
| Sucrose                         | —                      | +      | +                                            | +                                             | +                                             |
| D-Raffinose                     | —                      | +      | +                                            | +                                             | +                                             |
| 8% NaCl                         | +                      | —      | +                                            | +                                             | +                                             |
| D-Sorbitol                      | +                      | —      | +                                            | +                                             | +                                             |
| D-Aspartic Acid                 | —                      | —      | +                                            | +                                             | +                                             |
| D-Serine                        | +                      | —      | —                                            | —                                             | —                                             |
| Gelatin                         | —                      | —      | —                                            | —                                             | ±                                             |
| L-Arginine                      | —                      | —      | —                                            | —                                             | ±                                             |
| D-Saccharic                     | +                      | —      | —                                            | —                                             | —                                             |
| Naladixic Acid                  | —                      | —      | +                                            | +                                             | +                                             |
| K Tellurite                     | —                      | +      | +                                            | +                                             | +                                             |
| β-Hydroxy-DL-Butyric            | +                      | —      | —                                            | —                                             | —                                             |
| Propionic Acid                  | —                      | +      | +                                            | +                                             | +                                             |
| Na Bromate                      | —                      | ±      | +                                            | —                                             | —                                             |

<sup>a</sup> Symbols represent: +, positive; ±, weak; —, negative.

<sup>b</sup> CDC designation for *E. coli* O104:H4 strains. Ec 01, Ec 02, and Ec 03 are designations of the respective Ec strains in this study.

**Table S2.** Comparison of antibiotic susceptibilities between *E. coli* O104:H4 strains and *E. coli* O157:H7.

| Antibiotic                                    | Ec O157:H7 | Ec 01<br>(2011C-3493) | Ec 02<br>(2009EL-2050) | Ec 03<br>(2009EL-2071) |
|-----------------------------------------------|------------|-----------------------|------------------------|------------------------|
| Minimum inhibitory concentration (MIC), µg/ml |            |                       |                        |                        |
| Trimethoprim                                  | 0.060      | 64.000                | 64.000                 | 64.000                 |
| Co-Trimoxazole                                | 0.500      | 64.000                | 64.000                 | 64.000                 |
| Sulfamethoxazole                              | 64.000     | 64.000                | 64.000                 | 64.000                 |
| Azithromycin                                  | 4.000      | 1.000                 | 0.125                  | 0.125                  |
| Doxycycline                                   | 0.500      | 8.000                 | 8.000                  | 0.250                  |
| Tigecycline                                   | 0.060      | 0.060                 | 0.060                  | 0.060                  |
| Cefepime                                      | 0.030      | 64.000                | 0.030                  | 0.250                  |
| Faropenem                                     | 0.125      | 0.125                 | 0.125                  | 0.030                  |
| Ertapenem                                     | 0.030      | 0.030                 | 0.030                  | 0.030                  |
| Piperacillin                                  | 1.000      | 64.000                | 64.000                 | 32.000                 |
| Penicillin G                                  | 64.000     | 32.000                | 64.000                 | 64.000                 |
| Amoxicillin                                   | 2.000      | 64.000                | 64.000                 | 64.000                 |
| Ceftazidime                                   | 0.250      | 32.000                | 0.030                  | 0.125                  |
| Imipenem                                      | 0.125      | 0.125                 | 0.125                  | 0.125                  |
| Cefazolin                                     | 2.000      | 64.000                | 2.000                  | 4.000                  |
| Ampicillin                                    | 0.125      | 32.000                | 32.000                 | 32.000                 |
| Aztreonam                                     | 0.250      | 32.000                | 0.125                  | 0.250                  |
| Chloramphenicol                               | 2.000      | 0.500                 | 2.000                  | 2.000                  |
| Arbekacin                                     | 8.000      | 2.000                 | 1.000                  | 4.000                  |
| Amikacin                                      | 2.000      | 0.250                 | 0.500                  | 1.000                  |
| Gentamicin                                    | 1.000      | 0.125                 | 0.250                  | 0.250                  |
| Netilmicin                                    | 1.000      | 0.250                 | 0.060                  | 0.125                  |
| Streptomycin                                  | 8.000      | 64.000                | 64.000                 | 64.000                 |
| Ofloxacin                                     | 0.030      | 0.125                 | 0.125                  | 0.250                  |
| Sparfloxacin                                  | 0.030      | 0.030                 | 0.030                  | 0.030                  |
| Moxifloxacin                                  | 0.060      | 0.125                 | 0.030                  | 0.125                  |
| Gemifloxacin                                  | 0.060      | 0.030                 | 0.030                  | 0.030                  |
| Ciprofloxacin                                 | 0.015      | 0.030                 | 0.125                  | 0.125                  |
| Novobiocin                                    | 32.000     | 4.000                 | 32.000                 | 32.000                 |

**A. Binding of Congo Red by *E. coli* strains.**

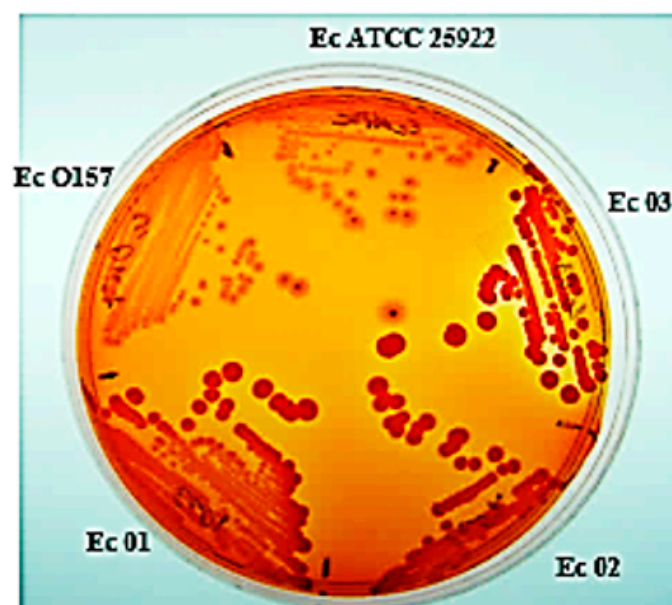

**B. Pellets of *E. coli* strains.**

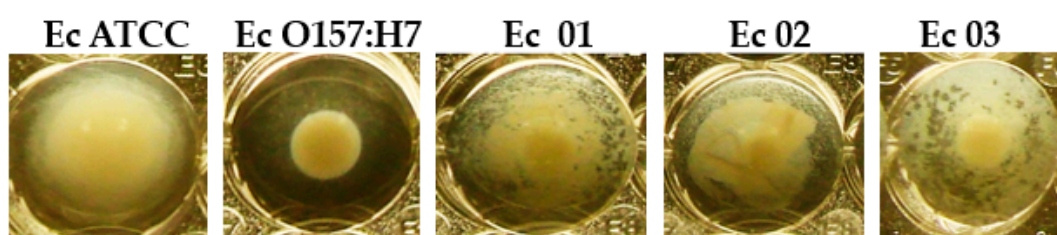

**Figure S1.** Characteristics of *E. coli* strains used in the present study.

# AggA Major pilin

|      |            |            |            |            |            |
|------|------------|------------|------------|------------|------------|
|      | 10         | 20         | 30         | 40         | 50         |
| Ec01 | MKTLKNMRRK | NLYITLGLVS | LLSGGANAAS | QOTTQTIRLT | VTNDCPVTIT |
| Ec02 | MKTLKNMRRK | NLYITLGLVS | LLSGGANAAS | QOTTQTIRLT | VTNDCPVTIT |
| Ec03 | MKTLKNMRRK | NLYITLGLVS | LLSGGANAAS | QOTTQTIRLT | VTNDCPVTIT |
|      | 60         | 70         | 80         | 90         | 100        |
| Ec01 | TTPPQTVGVS | STTPIGFSAK | VTTSDQCIKA | GAKVWLWGTG | PANKWVLQHA |
| Ec02 | TTPPQTVGVS | STTPIGFSAK | VTTSDQCIKA | GAKVWLWGTG | PANKWVLQHA |
| Ec03 | TTPPQTVGVS | STTPIGFSAK | VTTSDQCIKA | GAKVWLWGTG | PANKWVLQHA |
|      | 110        | 120        | 130        | 140        | 150        |
| Ec01 | KVAKQKYTLN | PSIDGGADFV | NQGTDAKIYK | KLTSGNKFLN | ASVSVNPKTQ |
| Ec02 | KVAKQKYTLN | PSIDGGADFV | NQGTDAKIYK | KLTSGNKFLN | ASVSVNPKTQ |
| Ec03 | KVAKQKYTLN | PSIDGGADFV | NQGTDAKIYK | KLTSGNKFLN | ASVSVNPKTQ |
|      | 160        | 167        |            |            |            |
| Ec01 | VLIPGEYTM  | LHAAVDF    |            |            |            |
| Ec02 | VLIPGEYTM  | LHAAVDF    |            |            |            |
| Ec03 | VLIPGEYTM  | LHAAVDF    |            |            |            |

# AggB Minor pilin

|      |            |            |            |            |            |
|------|------------|------------|------------|------------|------------|
|      | 10         | 20         | 30         | 40         | 50         |
| Ec01 | MLKKSILPMS | CGVLVMVMSG | LLDAAEITLI | SHKTLESQLR | DGMKLATGRI |
| Ec02 | MLKKSILPMS | CGVLVMVMSG | LLDAAEITLI | SHKTLESQLR | DGMKLATGRI |
| Ec03 | MLKKSILPMS | CGVLVMVMSG | LLDAAEITLI | SHKTLESQLR | DGMKLATGRI |
|      | 60         | 70         | 80         | 90         | 100        |
| Ec01 | ACREPHNGFY | IWINASQNGK | VGHYIVQNNR | ETKHELKVKI | GGGGWSSSLR |
| Ec02 | ACREPHNGFY | IWINASQNGK | VGHYIVQNNR | ETKHELKVKI | GGGGWSSSLR |
| Ec03 | ACREPHNGFY | IWINASQNGK | VGHYIVQNNR | ETKHELKVKI | GGGGWSSSLR |
|      | 110        | 120        | 130        | 140        | 145        |
| Ec01 | EGQRGVYRQG | EEKQAIFDIM | SDGNQYSAPG | EYIFSVSGEC | ITSRG      |
| Ec02 | EGQRGVYRQG | EEKQAIFDIM | SDGNQYSAPG | EYIFSVSGEC | ITSRG      |
| Ec03 | EGQRGVYRQG | EEKQAIFDIM | SDGNQYSAPG | EYIFSVSGEC | ITSRG      |

# AggC Usher protein

|      | 10          | 20         | 30         | 40         | 50         |
|------|-------------|------------|------------|------------|------------|
| Ec01 | MKTSSFIIVI  | LLCFRIENVI | AHTFSFDASL | LNHGSGGIDL | TLLEKGGQLP |
| Ec02 | MKTSSFIIVI  | LLCFRIENVI | AHTFSFDASL | LNHGSGGIDL | TLLEKGGQLP |
| Ec03 | MKTSSFIIVI  | LLCFRIENVI | AHTFSFDASL | LNHGSGGIDL | TLLEKGGQLP |
|      | 60          | 70         | 80         | 90         | 100        |
| Ec01 | GIYPVDIILN  | GSRIDSRDIF | FYTKKNRHGE | YYLKPCLTRD | ILINYGVKIE |
| Ec02 | GIYPVDIILN  | GSRIDSRDIF | FYTKKNRHGE | YYLKPCLTRD | ILINYGVKIE |
| Ec03 | GIYPVDIILN  | GSRIDSRDIF | FYTKKNRHGE | YYLKPCLTRD | ILINYGVKIE |
|      | 110         | 120        | 130        | 140        | 150        |
| Ec01 | EYPNLFRQNS  | EKNRDSSDCA | DLSVIPQATE | DYHFIKQQLI | LGIPQVAIHP |
| Ec02 | EYPNLFRQNS  | EKNRDSSDCA | DLSVIPQATE | DYHFIKQQLI | LGIPQVAIHP |
| Ec03 | EYPNLFRQNS  | EKNRDSSDCA | DLSVIPQATE | DYHFIKQQLI | LGIPQVAIHP |
|      | 160         | 170        | 180        | 190        | 200        |
| Ec01 | PLTGIAHETM  | WDDGISAFLL | NWQVEGGHWE | YRSNTRNSSD | NFWASLEPGI |
| Ec02 | PLTGIAHETM  | WDDGISAFLL | NWQVEGGHWE | YRSNTRNSSD | NFWASLEPGI |
| Ec03 | PLTGIAHETM  | WDDGISAFLL | NWQVEGGHWE | YRSNTRNSSD | NFWASLEPGI |
|      | 210         | 220        | 230        | 240        | 250        |
| Ec01 | NLGSWRIRNL  | TTWNKSSGQS | GKWESSYIRV | ERGLNNIKSR | LTFGDDYTPS |
| Ec02 | NLGSWRIRNL  | TTWNKSSGQS | GKWESSYIRV | ERGLNNIKSR | LTFGDDYTPS |
| Ec03 | NLGSWRIRNL  | TTWNKSSGQS | GKWESSYIRV | ERGLNNIKSR | LTFGDDYTPS |
|      | 260         | 270        | 280        | 290        | 300        |
| Ec01 | DIFDSVPFRG  | GMLGSDENMV | PYNQREFAPV | VRGIARTQAR | IEVRQNGYLI |
| Ec02 | DIFDSVPFRG  | GMLGSDENMV | PYNQREFAPV | VRGIARTQAR | IEVRQNGYLI |
| Ec03 | DIFDSVPFRG  | GMLGSDENMV | PYNQREFAPV | VRGIARTQAR | IEVRQNGYLI |
|      | 310         | 320        | 330        | 340        | 350        |
| Ec01 | QSRIVSPGAF  | ALTDLPVTGN | GGDLQVWVLE | SDGTIQTFNV | PFTTPAIALR |
| Ec02 | QSRIVSPGAF  | ALTDLPVTGN | GGDLQVWVLE | SDGTIQTFNV | PFTTPAIALR |
| Ec03 | QSRIVSPGAF  | ALTDLPVTGN | GGDLQVWVLE | SDGTIQTFNV | PFTTPAIALR |
|      | 360         | 370        | 380        | 390        | 400        |
| Ec01 | EGYLKYNVTV  | GEYRPSDDSI | EGAYLGQLTA | MYGLPWSLTA | FGGIQVSEHY |
| Ec02 | EGYLKYNVTV  | GEYRPSDDSI | EGAYLGQLTA | MYGLPWSLTA | FGGIQVSEHY |
| Ec03 | EGYLKYNVTV  | GEYRPSDDSI | EGAYLGQLTA | MYGLPWSLTA | FGGIQVSEHY |
|      | 410         | 420        | 430        | 440        | 450        |
| Ec01 | QGNAALGLGLS | LGGFGSISLD | TIYSRGQQKG | YSNEIGKTWR | VRYDKSFELT |
| Ec02 | QGNAALGLGLS | LGGFGSISLD | TIYSRGQQKG | YSNEIGKTWR | VRYDKSFELT |
| Ec03 | QGNAALGLGLS | LGGFGSISLD | TIYSRGQQKG | YSNEIGKTWR | VRYDKSFELT |
|      | 460         | 470        | 480        | 490        | 500        |
| Ec01 | GTSFAAGYQD  | SSAGYHSLAD | VLDTYRNGTA | YRSYDNRIRR | TTINISQALG |
| Ec02 | GTSFAAGYQD  | SSAGYHSLAD | VLDTYRNGTA | YRSYDNRIRR | TTINISQALG |
| Ec03 | GTSFAAGYQD  | SSAGYHSLAD | VLDTYRNGTA | YRSYDNRIRR | TTINISQALG |

|      |            |            |            |            |            |
|------|------------|------------|------------|------------|------------|
|      | 510        | 520        | 530        | 540        | 550        |
| Ec01 | EWGSVALNGG | RDEYRDKVKQ | DYIGASYSNS | WKGITFAVNW | SRNNNIGDYY |
| Ec02 | EWGSVALNGG | RDEYRDKVKQ | DYIGASYSNS | WKGITFAVNW | SRNNNIGDYY |
| Ec03 | EWGSVALNGG | RDEYRDKVKQ | DYIGASYSNS | WKGITFAVNW | SRNNNIGDYY |
|      | 560        | 570        | 580        | 590        | 600        |
| Ec01 | SNSLRTENNL | NLWMSIPMKR | WLGDDDKGVT | ATAQIQRITG | QNTLYETGLN |
| Ec02 | SNSLRTENNL | NLWMSIPMKR | WLGDDDKGVT | ATAQIQRITG | QNTLYETGLN |
| Ec03 | SNSLRTENNL | NLWMSIPMKR | WLGDDDKGVT | ATAQIQRITG | QNTLYETGLN |
|      | 610        | 620        | 630        | 640        | 650        |
| Ec01 | GRAFGQKLYW | DIREQIVPGS | KYDADTSLN  | LRWSGGYGEL | TGMYSYNRNT |
| Ec02 | GRAFGQKLYW | DIREQIVPGS | KYDADTSLN  | LRWSGGYGEL | TGMYSYNRNT |
| Ec03 | GRAFGQKLYW | DIREQIVPGS | KYDADTSLN  | LRWSGGYGEL | TGMYSYNRNT |
|      | 660        | 670        | 680        | 690        | 700        |
| Ec01 | RQMNVTSGS  | MAIHSGGIAF | GQKTDDTMAL | IAAPGIAGAS | VGGWPGVSTD |
| Ec02 | RQMNVTSGS  | MAIHSGGIAF | GQKTDDTMAL | IAAPGIAGAS | VGGWPGVSTD |
| Ec03 | RQMNVTSGS  | MAIHSGGIAF | GQKTDDTMAL | IAAPGIAGAS | VGGWPGVSTD |
|      | 710        | 720        | 730        | 740        | 750        |
| Ec01 | FRGYTLVGHV | SPYQENIITL | DPTTFPDNTE | VSQTDRRVIP | TKGALVQAEF |
| Ec02 | FRGYTLVGHV | SPYQENIITL | DPTTFPDNTE | VSQTDRRVIP | TKGALVQAEF |
| Ec03 | FRGYTLVGHV | SPYQENIITL | DPTTFPDNTE | VSQTDRRVIP | TKGALVQAEF |
|      | 760        | 770        | 780        | 790        | 800        |
| Ec01 | KTRVGNRALV | TLTRKDGTL  | PFGTVVTLE  | KTGEAFESAG | VVDDKGKVYL |
| Ec02 | KTRVGNRALV | TLTRKDGTL  | PFGTVVTLE  | KTGEAFESAG | VVDDKGKVYL |
| Ec03 | KTRVGNRALV | TLTRKDGTL  | PFGTVVTLE  | KTGEAFESAG | VVDDKGKVYL |
|      | 810        | 820        | 830        | 840        | 842        |
| Ec01 | SGLSEAGKLK | AQWGTNSQCY | ADYKLPLKKG | MSGIFLTRAV | CM         |
| Ec02 | SGLSEAGKLK | AQWGTNSQCY | ADYKLPLKKG | MSGIFLTRAV | CM         |
| Ec03 | SGLSEAGKLK | AQWGTNSQCY | ADYKLPLKKG | MSGIFLTRAV | CM         |

# AggD Chaperone protein

|      |            |            |            |            |            |
|------|------------|------------|------------|------------|------------|
|      | 10         | 20         | 30         | 40         | 50         |
| Ec01 | MKIRRIVSTI | AIALSVFTFA | HAQSFENVEN | NAKVFSLHLG | ATRMLYKPNS |
| Ec02 | MKIRRIVSTI | AIALSVFTFA | HAQSFENVEN | NAKVFSLHLG | ATRMLYKPNS |
| Ec03 | MKIRRIVSTI | AIALSVFTFA | HAQSFENVEN | NAKVFSLHLG | ATRMLYKPNS |
|      | 60         | 70         | 80         | 90         | 100        |
| Ec01 | SGETLAVINE | HNYPILVQAN | VLSEDQKNIA | PFIITPPLFR | LDALQSSRLR |
| Ec02 | SGETLAVINE | HNYPILVQAN | VLSEDQKNIA | PFIITPPLFR | LDALQSSRLR |
| Ec03 | SGETLAVINE | HNYPILVQAN | VLSEDQKNIA | PFIITPPLFR | LDALQSSRLR |
|      | 110        | 120        | 130        | 140        | 150        |
| Ec01 | IVKTEGAFPI | DRESLQWICV | KAIPPKYEDK | WAKEEVSGKK | SDEATMNIQV |
| Ec02 | IVKTEGAFPI | DRESLQWICV | KAIPPKYEDK | WAKEEVSGKK | SDEATMNIQV |
| Ec03 | IVKTEGAFPI | DRESLQWICV | KAIPPKYEDK | WAKEEVSGKK | SDEATMNIQV |
|      | 160        | 170        | 180        | 190        | 200        |
| Ec01 | SVSSCIKLFV | RPADVKGQPD | DVAGKIKWQK | VGNKLKGVNP | TPFYMDIAEL |
| Ec02 | SVSSCIKLFV | RPADVKGQPD | DVAGKIKWQK | VGNKLKGVNP | TPFYMDIAEL |
| Ec03 | SVSSCIKLFV | RPADVKGQPD | DVAGKIKWQK | VGNKLKGVNP | TPFYMDIAEL |
|      | 210        | 220        | 230        | 240        | 250        |
| Ec01 | RVGEKEITET | HYIAPFSSYE | YPMPVNGGGD | VRWKVVTDYG | GISKTFETGL |
| Ec02 | RVGEKEITET | HYIAPFSSYE | YPMPVNGGGD | VRWKVVTDYG | GISKTFETGL |
| Ec03 | RVGEKEITET | HYIAPFSSYE | YPMPVNGGGD | VRWKVVTDYG | GISKTFETGL |
|      | 252        |            |            |            |            |
| Ec01 | NI         |            |            |            |            |
| Ec02 | NI         |            |            |            |            |
| Ec03 | NI         |            |            |            |            |

**Figure S2.** Comparison of the amino acid sequences of the AggA, AggB, AggC, and AggD AAF/I proteins from *E. coli* O104:H4 2011C-3493, 2009E-2050, and 2009E-2071 strains.
